# Supplementary material for: Investigation of the role of terminal ligands in magnetic relaxation in a series of dinuclear dysprosium complexes
Source: Royal Society of Chemistry journal article supplement (doi:10.1039/d0qi00558d), 2020-01-01
Supplement: d0qi00558d1.pdf [file d0qi00558d1.pdf]

Supporting Information File

**Investigation of role of the terminal ligands on magnetic relaxation in a series of dinuclear dysprosium complexes**

Siba Prasad Bera, Arpan Mondal, Sanjit Konar\*

Department of Chemistry, Indian Institute of Science Education and Research Bhopal, Bhopal Bypass Road, Bhauri, Bhopal 462 066, India. E-mail: skonar@iiserb.ac.in; Fax: +91-755-6692392; Tel: +91-755-26691313.

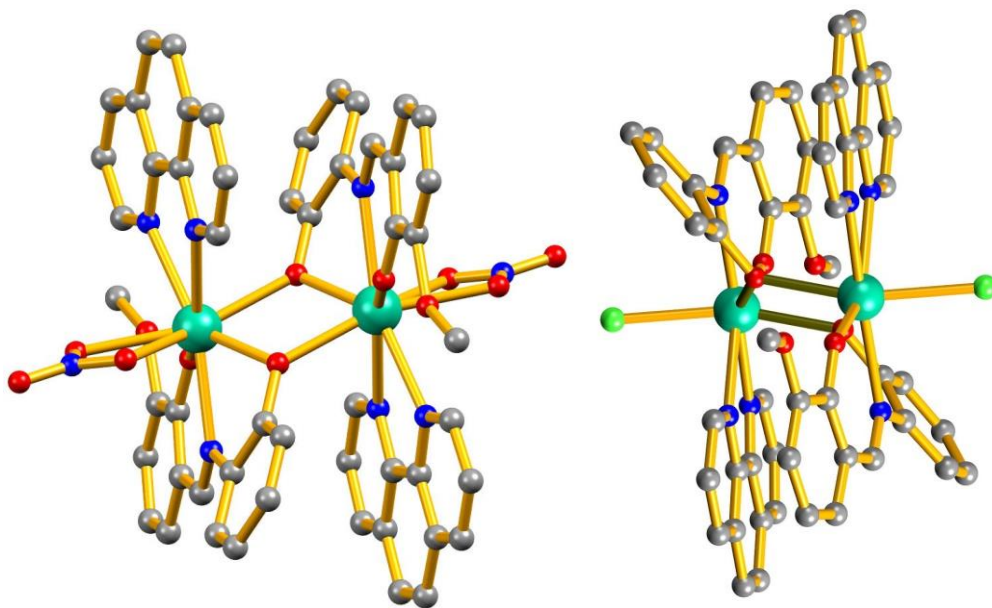

**Figure S1.** View of complex **2** and **3** (left and right) and hydrogen atoms are omitted for clarity {cyan, Dy; pink, P; gray, C; red, O; blue, N and green, Cl}.

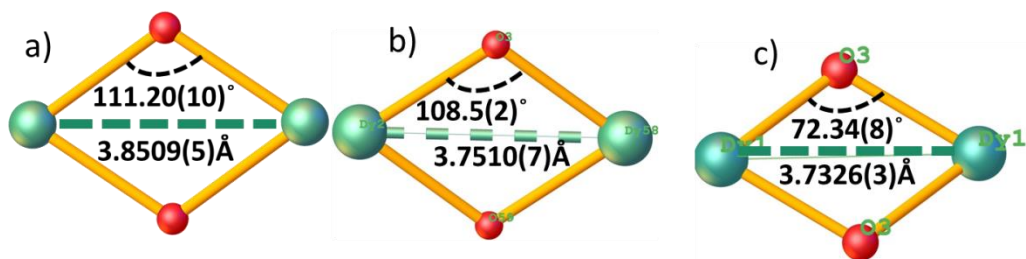

**Figure S2.** Dy<sup>3+</sup> ... Dy<sup>3+</sup> distance and phenoxide oxygen bridging bond angle of complexes 1(a), 2(b) and 3(c).

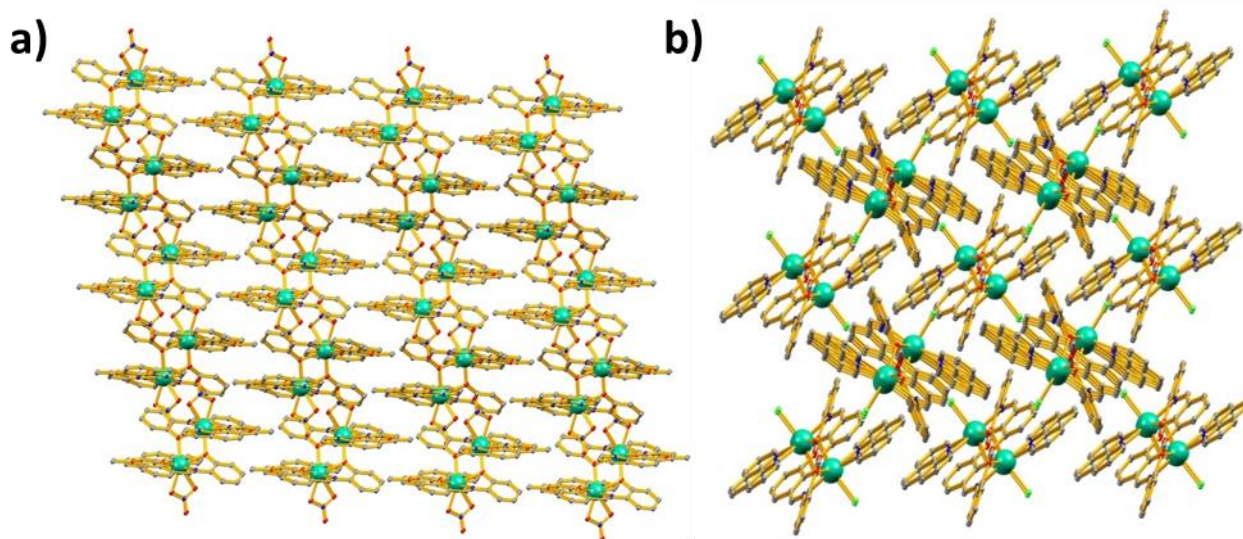

**Figure S3.** Packing view and shortest intermolecular Dy<sup>3+</sup> ... Dy<sup>3+</sup> distance of complexes 2 (a) and 3 (b)

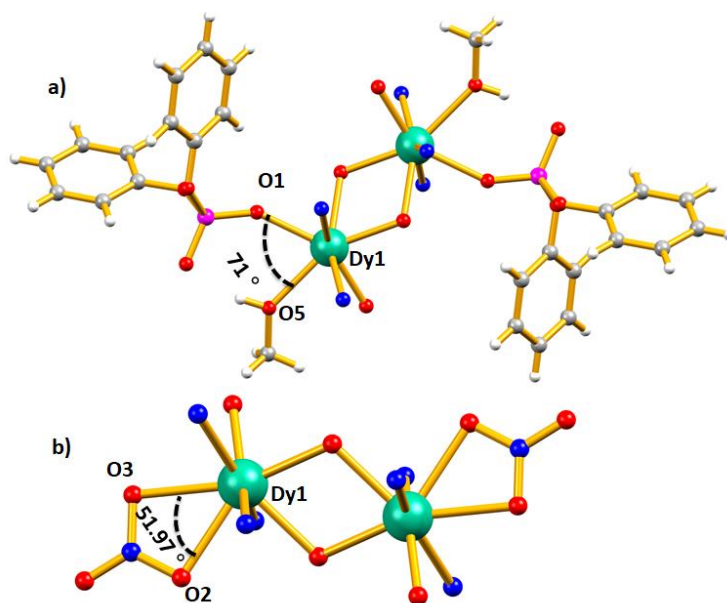

**Figure S4.** Bond angle of terminal oxygen with Dy<sup>3+</sup> for complex 1(a) and 2(b).

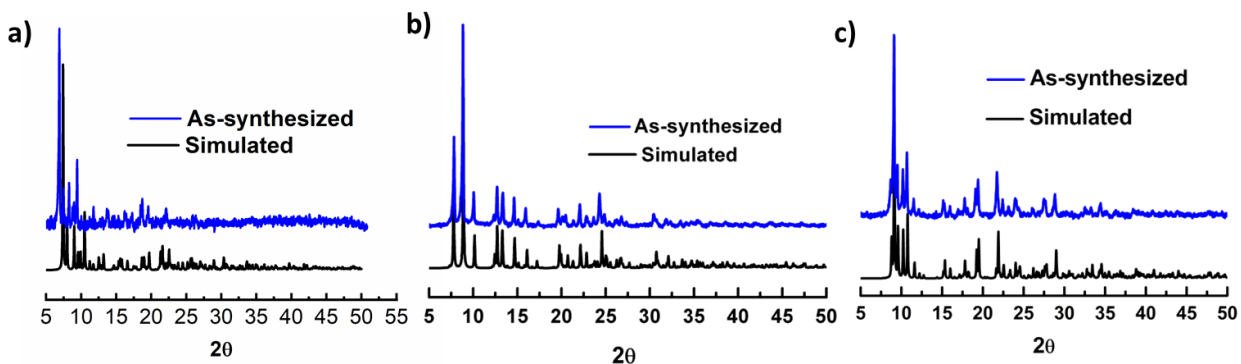

**Figure S5.** PXRD pattern of complexes: (a), complex 1; (b), complex 2 and (c), complex 3.

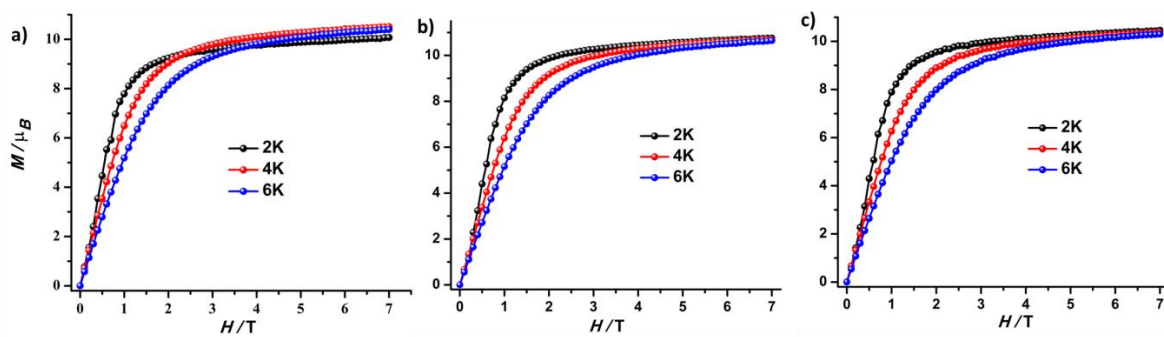

**Figure S6.** Field dependence of magnetization at depicted temperatures for complexes 1 (a), 2(b) and 3(c).

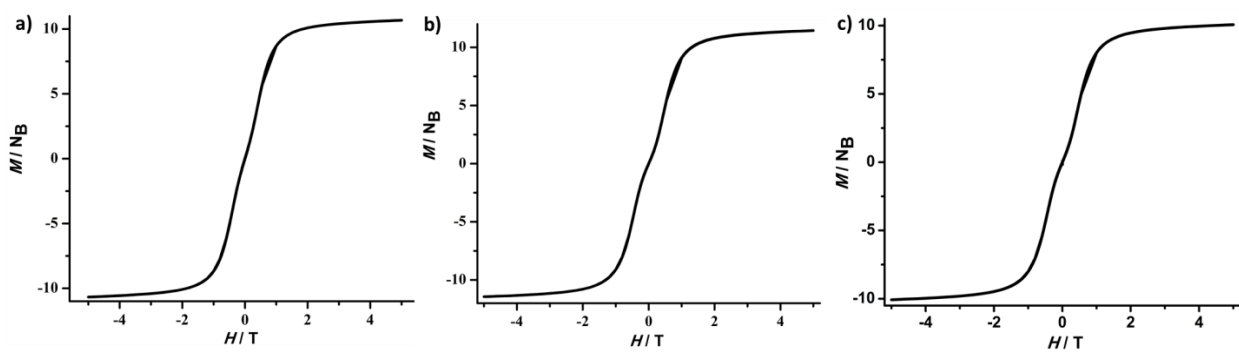

**Figure S7.** Hysteresis plot of complexes 1–3 (a-c) with the sweep rate 400 Oe/sec at 1.8 K.

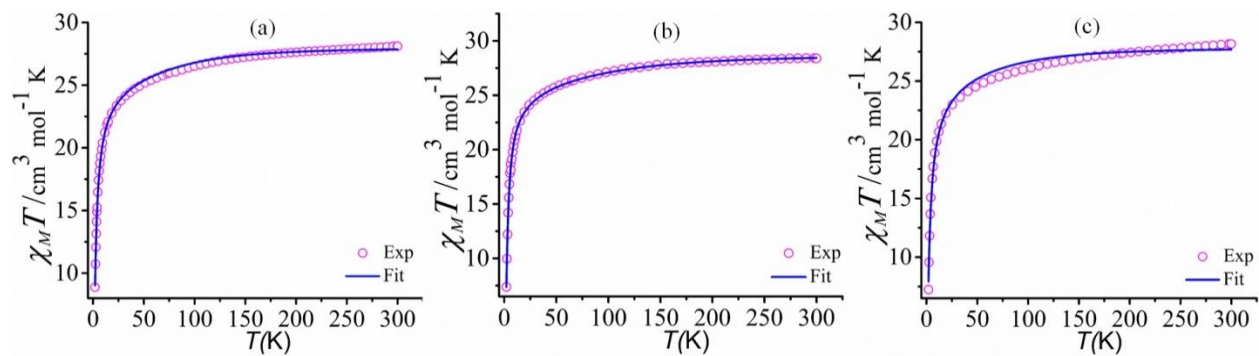

**Figure S8.** Experimental and simulation of  $\chi_M T$  vs T plots using PHI software for complexes **1-3**.

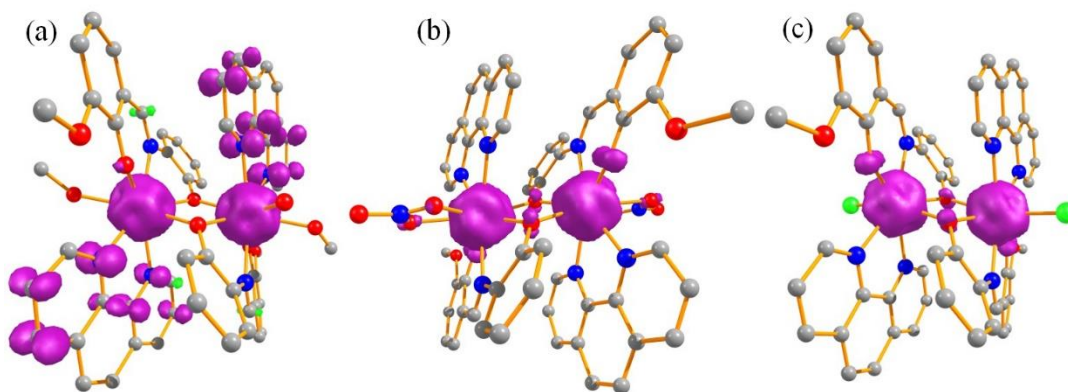

**Figure S9.** The spin density plots for complexes **1-3** (a-b).

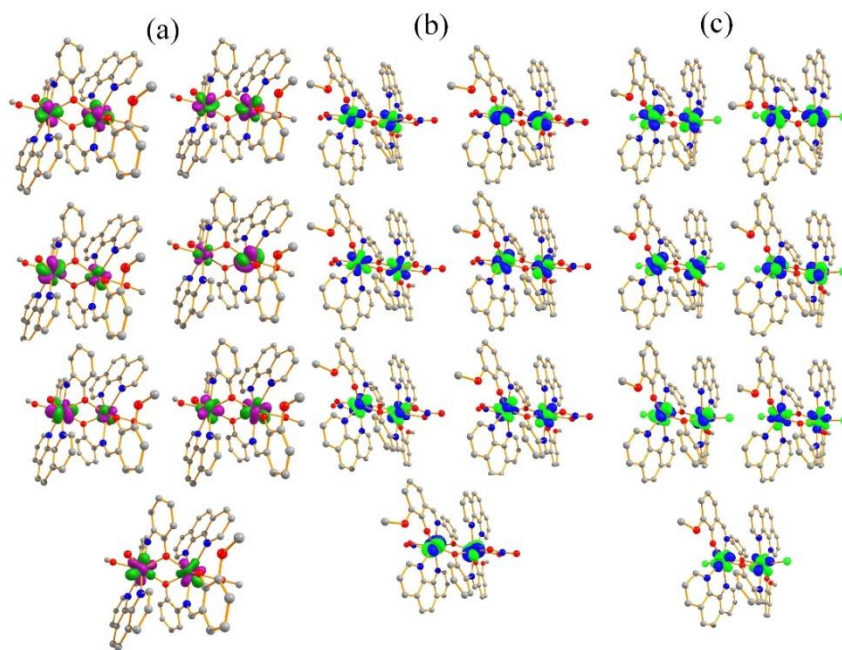

**Figure S10.** Magnetic orbitals of complexes **1-3** (a-c).

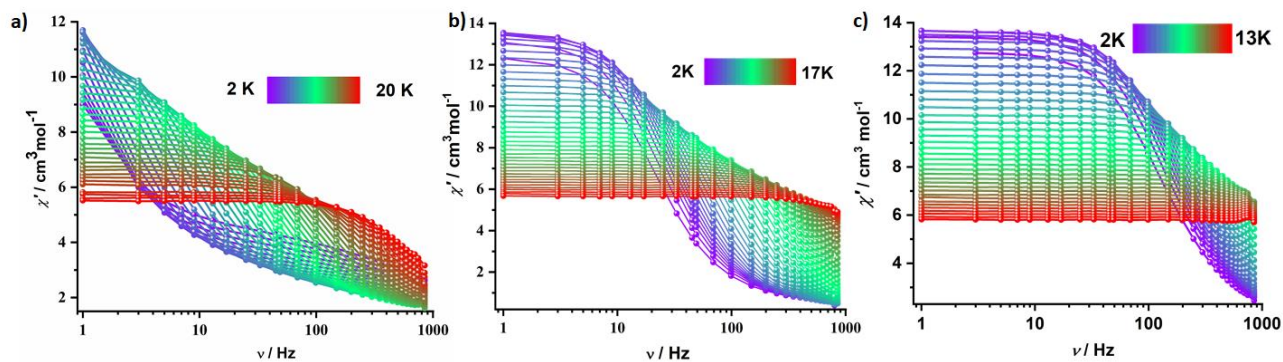

**Figure S10.** The out-of-phase ( $\chi''$ ) signals of the frequency dependence of ac susceptibility signals at given temperature in absence of DC field for complex 1-3(a-c).

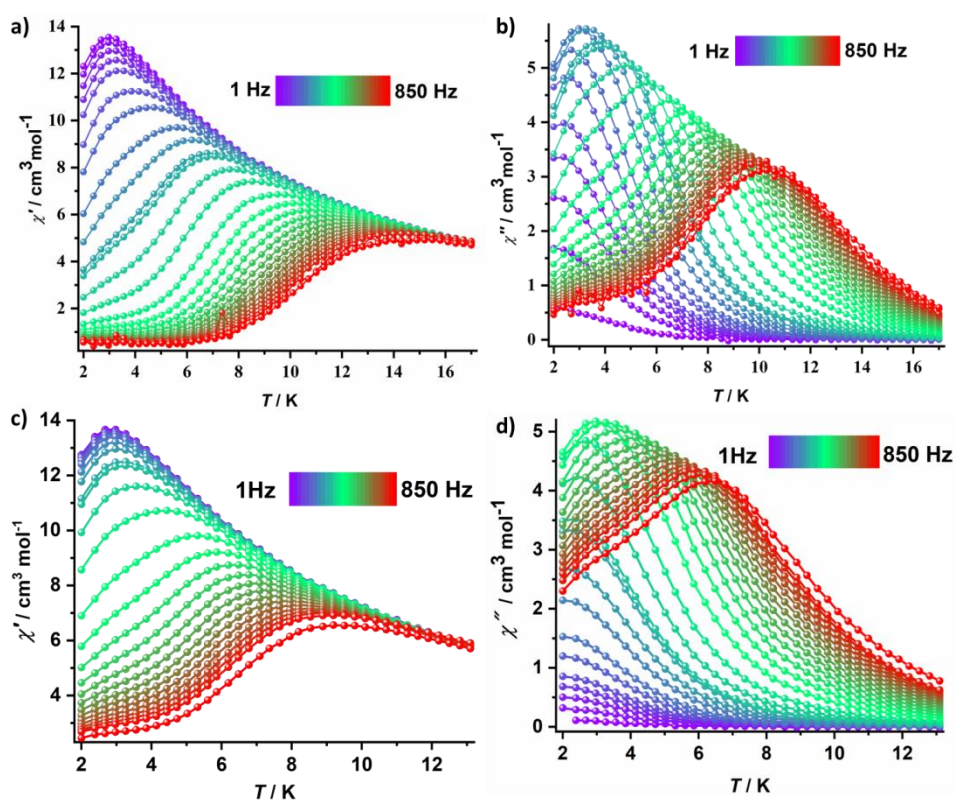

**Figure S11.** The in-phase ( $\chi'$ ) and out-of-phase ( $\chi''$ ) signals of the temperature dependence of ac susceptibility signals at given frequencies under absence of DC field for complexes 2-3 (a-d)

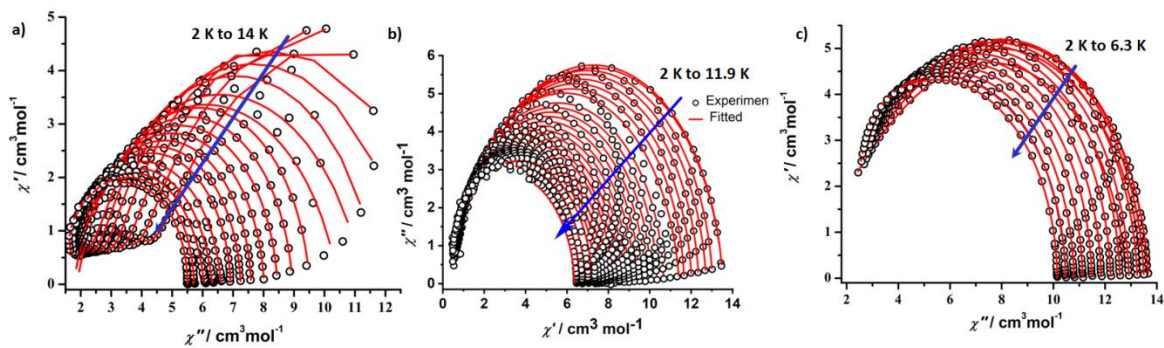

**Figure S12.** Cole Cole plot for complexes **1–3** (a–c) in a zero static field.

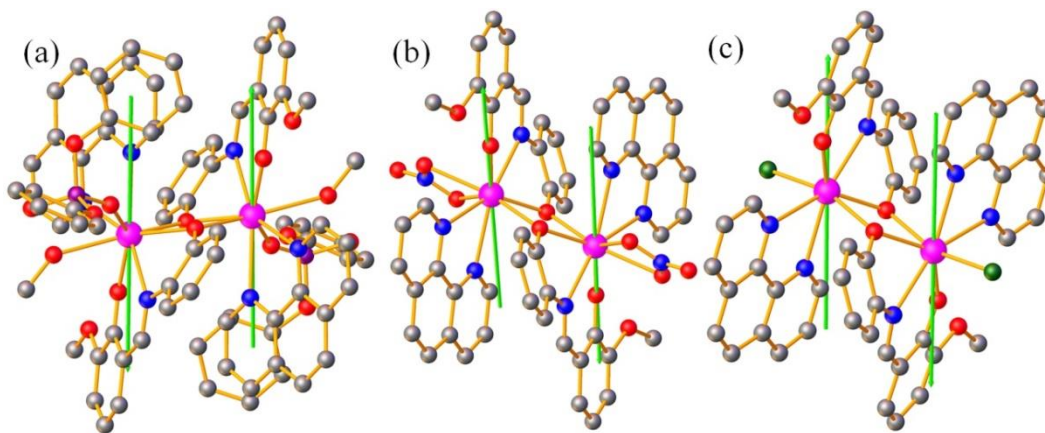

**Figure S13.** Single\_Ano computed local anisotropy axis  $g_z$  (green lines) for complexes **1–3** (a–c).

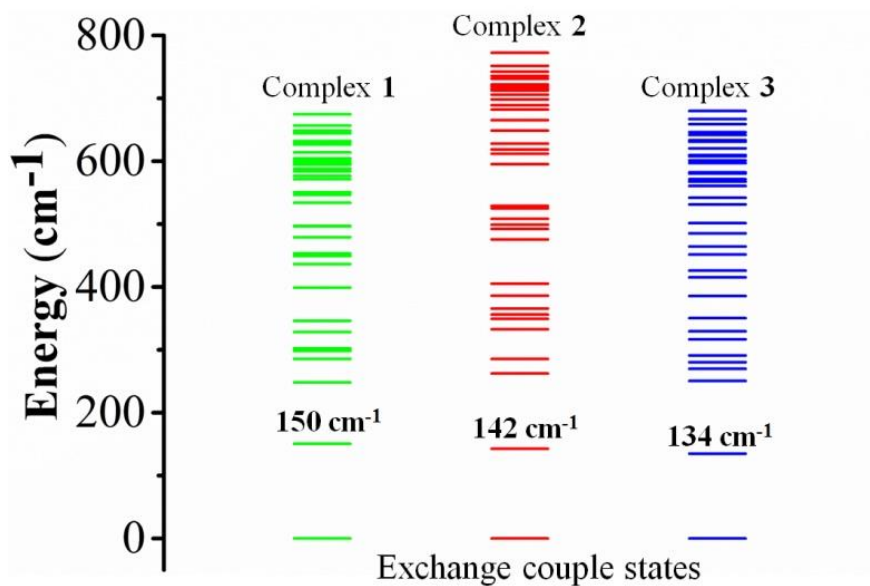

**Figure S14:** Energy of the exchange coupled state obtained from the simulation of susceptibility data using PHI for complexes **1–3**.

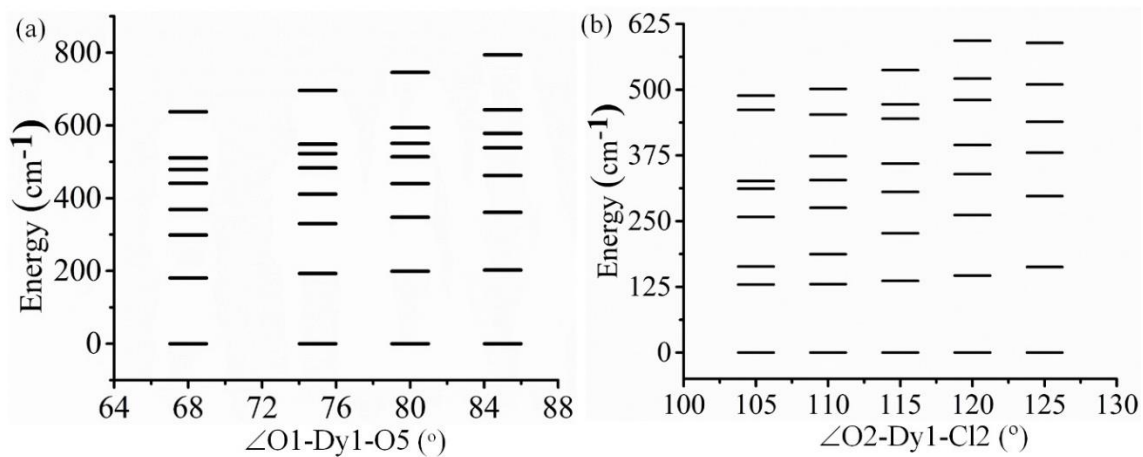

**Figure S15:** The energy of the KDs with the change of bond angle of the model complexes **1a-1d** (a) and **3-3d** (b).

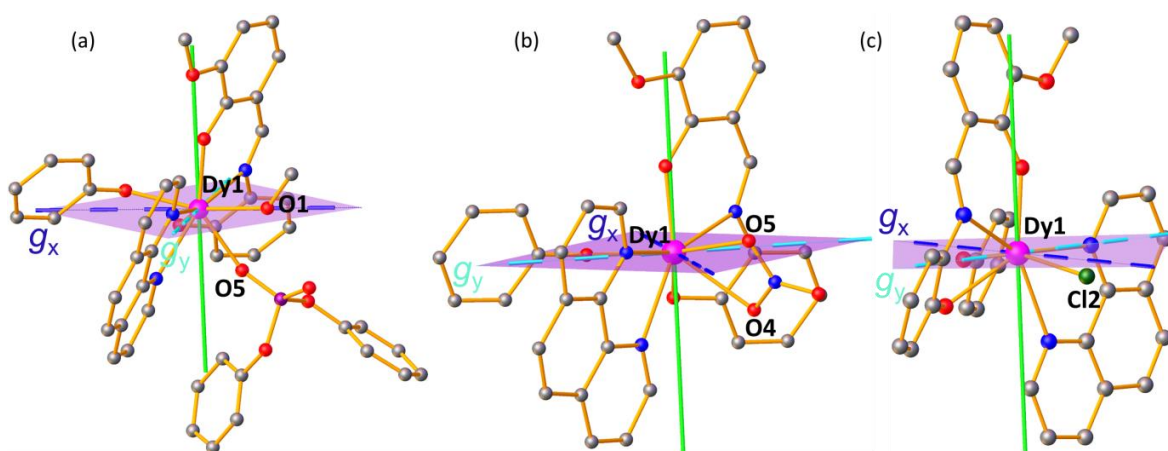

**Figure S16:** Represents the hard axes planes for complexes **1(a)**, **2(b)** and **3 (c)**

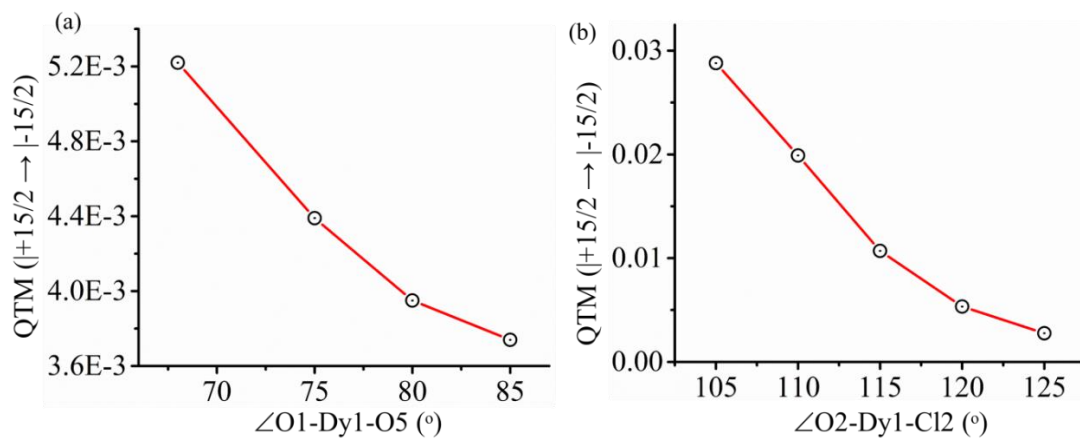

**Figure S17:** Change of QTM between the ground state KDs with the respective bond angle for model complexes **1a-1d** (a) and **3-3d** (b)

**Table S1:** X-ray crystallographic data

|                                                 | Complex 1                                                                                     | Complex 2                                                                      | Complex 3                                                                                     |
|-------------------------------------------------|-----------------------------------------------------------------------------------------------|--------------------------------------------------------------------------------|-----------------------------------------------------------------------------------------------|
| Formula                                         | C <sub>78</sub> H <sub>66</sub> Dy <sub>2</sub> N <sub>6</sub> O <sub>16</sub> P <sub>2</sub> | C <sub>52</sub> H <sub>38</sub> Dy <sub>2</sub> N <sub>8</sub> O <sub>12</sub> | C <sub>52</sub> H <sub>38</sub> Cl <sub>2</sub> Dy <sub>2</sub> N <sub>6</sub> O <sub>6</sub> |
| <i>M</i> <sub>w</sub> (g mol <sup>-1</sup> )    | 1730.30                                                                                       | 1291.90                                                                        | 1238.78                                                                                       |
| Crystal system                                  | Monoclinic                                                                                    | Monoclinic                                                                     | Monoclinic                                                                                    |
| Space group                                     | <i>P</i> 2 <sub>1</sub> / <i>n</i>                                                            | <i>C</i> 2/ <i>c</i>                                                           | <i>P</i> 2 <sub>1</sub> / <i>n</i>                                                            |
| T (K)                                           | 140.0                                                                                         | 140.0                                                                          | 140(2)                                                                                        |
| <i>a</i> (Å)                                    | 12.3944(10)                                                                                   | 23.4456(15)                                                                    | 11.5978(3)                                                                                    |
| <i>b</i> (Å)                                    | 16.8447(14)                                                                                   | 14.2211(8)                                                                     | 11.6814(3)                                                                                    |
| <i>c</i> (Å)                                    | 17.3271(14)                                                                                   | 14.9699(8)                                                                     | 17.3607(4)                                                                                    |
| <i>α</i> (°)                                    | 90                                                                                            | 90                                                                             | 90                                                                                            |
| <i>β</i> (°)                                    | 103.003(2)                                                                                    | 104.704(2)                                                                     | 95.2840(10)                                                                                   |
| <i>γ</i> (°)                                    | 90                                                                                            | 90                                                                             | 90                                                                                            |
| <i>V</i> (Å <sup>3</sup> )                      | 3524.8(5)                                                                                     | 4827.8(5)                                                                      | 2342.01(10)                                                                                   |
| <i>Z</i>                                        | 2                                                                                             | 4                                                                              | 2                                                                                             |
| <i>ρ</i> <sub>calcd</sub> (g cm <sup>-3</sup> ) | 1.630                                                                                         | 1.777                                                                          | 1.757                                                                                         |
| <i>μ</i> (MoKα) (mm <sup>-1</sup> )             | 2.224                                                                                         | 3.146                                                                          | 3.338                                                                                         |
| F(000)                                          | 1732.0                                                                                        | 2536.0                                                                         | 1212.0                                                                                        |
| Collected reflections                           | 59685                                                                                         | 21543                                                                          | 15257                                                                                         |
| Independent reflections                         | 7278                                                                                          | 4594                                                                           | 4300                                                                                          |
| Goodness-of-fit (GOF) on F <sup>2</sup>         | 1.027                                                                                         | 1.070                                                                          | 0.920                                                                                         |
| R <sub>1</sub> , (I > 2σI) <sup>a</sup>         | 0.0393                                                                                        | 0.0537                                                                         | 0.0249                                                                                        |
| wR <sub>2</sub> , (I > 2σI) <sup>a</sup>        | 0.0591                                                                                        | 0.1011                                                                         | 0.0487                                                                                        |
| CCDC Number                                     | 1987110                                                                                       | 1987111                                                                        | 1987112                                                                                       |

$$^a R_1 = \sum |F_o| - |F_c| / \sum |F_o| \text{ and } wR_2 = \sqrt{\sum w(|F_o|^2 - |F_c|^2)^2} / \sum w(F_o)^2^{1/2}$$



**Table S2:** Relevant bond distances (Å) for complexes 1–3

| 1                    |           | 2                    |           | 3                    |           |
|----------------------|-----------|----------------------|-----------|----------------------|-----------|
| Dy1–Dy1 <sup>1</sup> | 3.8509(5) | Dy1–Dy1 <sup>1</sup> | 3.7510(7) | Dy1–Dy1 <sup>1</sup> | 3.7326(3) |
| Dy1– O2              | 2.350(3)  | Dy1– O3 <sup>1</sup> | 2.305(5)  | Dy1– Cl2             | 2.6172(9) |
| Dy1– O2 <sup>1</sup> | 2.317(3)  | Dy1– O3              | 2.317(5)  | Dy1– O3 <sup>1</sup> | 2.311(2)  |
| Dy1– O3              | 2.201(3)  | Dy1– O4              | 2.465(6)  | Dy1– O3              | 2.313(2)  |
| Dy1– O5              | 2.333(3)  | Dy1– O2              | 2.156(6)  | Dy1– O2              | 2.150(2)  |
| Dy1– N3              | 2.542(3)  | Dy1– O5              | 2.461(5)  | Dy1– N3              | 2.464(3)  |
| Dy1– O1              | 2.476(3)  | Dy1– N1              | 2.548(6)  | Dy1– N2              | 2.529(3)  |
| Dy1– N1              | 2.476(3)  | Dy1– N3              | 2.461(7)  | Dy1– N1              | 2.515(3)  |
| Dy1– N2              | 2.570(3)  | Dy1– N2              | 2.507(6)  |                      |           |

Complex 1: <sup>1</sup>1-X,1-Y,1-Z; Complex 2: <sup>1</sup>1/2-X,3/2-Y,1-Z; Complex 3: <sup>1</sup>-X,-Y,1-Z

**Table S3.** Relevant bond angles (°) around the metal centers found in complexes 1–3**Complex 1**

| Atom            | Atom | Atom             | Angle/°    | Atom | Atom | Atom | Angle/°  |
|-----------------|------|------------------|------------|------|------|------|----------|
| O2 <sup>1</sup> | Dy1  | Dy1 <sup>1</sup> | 34.67(6)   | C27  | C22  | C23  | 119.8(4) |
| O2              | Dy1  | Dy1 <sup>1</sup> | 34.13(6)   | C6   | N2   | Dy1  | 119.4(3) |
| O2 <sup>1</sup> | Dy1  | O2               | 68.80(10)  | C2   | N2   | Dy1  | 123.2(3) |
| O2 <sup>1</sup> | Dy1  | O5               | 132.66(9)  | C2   | N2   | C6   | 117.4(4) |
| O2              | Dy1  | N3               | 86.42(10)  | C22  | C23  | N1   | 115.2(4) |
| O2 <sup>1</sup> | Dy1  | N3               | 76.18(10)  | C24  | C23  | N1   | 124.9(4) |
| O2 <sup>1</sup> | Dy1  | O1               | 153.50(10) | C24  | C23  | C22  | 119.9(4) |
| O2              | Dy1  | O1               | 136.95(10) | N3   | C7   | C6   | 117.0(4) |
| O2 <sup>1</sup> | Dy1  | N1               | 107.68(10) | N3   | C7   | C11  | 122.7(4) |

|                 |     |                  |            |     |     |     |          |
|-----------------|-----|------------------|------------|-----|-----|-----|----------|
| O2              | Dy1 | N1               | 66.41(10)  | C11 | C7  | C6  | 120.3(4) |
| O2 <sup>1</sup> | Dy1 | N2               | 84.04(10)  | C10 | C9  | C8  | 119.0(4) |
| O2              | Dy1 | N2               | 144.07(10) | O3  | C15 | C20 | 123.8(4) |
| O3              | Dy1 | Dy1 <sup>1</sup> | 103.46(7)  | O3  | C15 | C16 | 118.8(4) |
| O3              | Dy1 | O2               | 119.13(10) | C20 | C15 | C16 | 117.4(4) |
| O3              | Dy1 | O2 <sup>1</sup>  | 83.87(10)  | C35 | C34 | O7  | 123.9(4) |
| O3              | Dy1 | O5               | 141.85(10) | C39 | C34 | O7  | 115.7(4) |
| O3              | Dy1 | N3               | 139.04(11) | C39 | C34 | C35 | 120.3(4) |
| O3              | Dy1 | O1               | 76.95(10)  | N2  | C6  | C7  | 118.5(4) |
| O3              | Dy1 | N1               | 72.64(11)  | N2  | C6  | C5  | 123.3(4) |
| O3              | Dy1 | N2               | 78.93(11)  | C5  | C6  | C7  | 118.2(4) |
| O5              | Dy1 | Dy1 <sup>1</sup> | 104.58(7)  | C15 | C20 | C21 | 121.7(4) |
| O5              | Dy1 | O2               | 75.18(9)   | C15 | C20 | C19 | 119.7(4) |
| O5              | Dy1 | N3               | 71.83(10)  | C19 | C20 | C21 | 118.4(4) |
| O5              | Dy1 | O1               | 70.99(10)  | C22 | C27 | C26 | 119.4(4) |
| O5              | Dy1 | N1               | 83.81(10)  | O4  | C16 | C15 | 113.7(4) |
| O5              | Dy1 | N2               | 110.82(10) | O4  | C16 | C17 | 125.2(4) |
| N3              | Dy1 | Dy1 <sup>1</sup> | 79.52(7)   | C17 | C16 | C15 | 121.1(5) |

<sup>1</sup>1-X,1-Y,1-Z

### Complex 2

| Atom | Atom | Atom | Angle/°    | Atom | Atom | Atom | Angle/°  |
|------|------|------|------------|------|------|------|----------|
| O3   | Dy1  | Dy11 | 35.64(12)  | O5   | N4   | Dy1  | 58.1(4)  |
| O31  | Dy1  | Dy11 | 35.85(13)  | O5   | N4   | O4   | 116.3(6) |
| O31  | Dy1  | O3   | 71.5(2)    | O6   | N4   | Dy1  | 178.2(6) |
| O31  | Dy1  | O4   | 141.3(2)   | O6   | N4   | O4   | 121.6(8) |
| O3   | Dy1  | O4   | 79.76(18)  | O6   | N4   | O5   | 122.1(8) |
| O3   | Dy1  | O5   | 128.56(19) | C8   | N3   | Dy1  | 128.7(7) |
| O31  | Dy1  | O5   | 159.0(2)   | C8   | N3   | C9   | 121.9(8) |
| O31  | Dy1  | N1   | 77.32(19)  | C9   | N3   | Dy1  | 109.4(5) |
| O3   | Dy1  | N1   | 80.1(2)    | C25  | N2   | Dy1  | 118.8(5) |
| O3   | Dy1  | N4   | 104.3(2)   | C24  | N2   | Dy1  | 122.9(5) |
| O31  | Dy1  | N4   | 162.5(2)   | C24  | N2   | C25  | 117.8(7) |
| O3   | Dy1  | N3   | 67.3(2)    | C26  | C18  | C19  | 118.1(9) |
| O31  | Dy1  | N3   | 111.40(19) | C17  | C18  | C26  | 117.9(8) |
| O31  | Dy1  | N2   | 82.01(19)  | C17  | C18  | C19  | 124.1(8) |
| O3   | Dy1  | N2   | 140.2(2)   | N1   | C26  | C18  | 122.0(8) |
| O4   | Dy1  | Dy11 | 111.69(14) | N1   | C26  | C25  | 117.8(7) |
| O4   | Dy1  | N1   | 72.6(2)    | C18  | C26  | C25  | 120.2(8) |
| O4   | Dy1  | N4   | 26.0(2)    | C16  | C17  | C18  | 120.1(8) |

|    |     |      |            |     |     |     |           |
|----|-----|------|------------|-----|-----|-----|-----------|
| O4 | Dy1 | N2   | 106.1(2)   | C17 | C16 | C15 | 118.7(9)  |
| O2 | Dy1 | Dy11 | 110.24(15) | N1  | C15 | C16 | 123.4(9)  |
| O2 | Dy1 | O31  | 88.8(2)    | C20 | C19 | C18 | 122.2(9)  |
| O2 | Dy1 | O3   | 125.5(2)   | C11 | C10 | C9  | 118.7(10) |
| O2 | Dy1 | O4   | 129.5(2)   | N3  | C8  | C4  | 126.6(9)  |
| O2 | Dy1 | O5   | 83.3(2)    | O3  | C14 | C13 | 121.9(8)  |
| O2 | Dy1 | N1   | 145.5(2)   | O3  | C14 | C9  | 117.7(8)  |
| O2 | Dy1 | N4   | 106.7(2)   | C13 | C14 | C9  | 120.3(8)  |
| O2 | Dy1 | N3   | 74.5(3)    | C25 | C21 | C20 | 117.9(9)  |
| O2 | Dy1 | N2   | 81.7(2)    | C22 | C21 | C25 | 117.2(8)  |
| O5 | Dy1 | Dy11 | 163.43(16) | C22 | C21 | C20 | 124.8(8)  |
| O5 | Dy1 | O4   | 51.9(2)    | N2  | C25 | C26 | 118.6(7)  |
| O5 | Dy1 | N1   | 98.4(2)    | N2  | C25 | C21 | 121.7(8)  |
| O5 | Dy1 | N4   | 25.9(2)    | C21 | C25 | C26 | 119.7(8)  |
| O5 | Dy1 | N3   | 85.3(2)    | C19 | C20 | C21 | 121.9(9)  |
| O5 | Dy1 | N2   | 77.6(2)    | C12 | C13 | C14 | 120.0(9)  |

<sup>1</sup>/<sub>2</sub>-X,<sub>3</sub>/<sub>2</sub>-Y,1-Z

### Complex 3

| Atom            | Atom | Atom             | Angle/°   | Atom | Atom | Atom | Angle/°  |
|-----------------|------|------------------|-----------|------|------|------|----------|
| C12             | Dy1  | Dy1 <sup>1</sup> | 136.51(2) | C12  | C4   | C5   | 118.6(4) |
| O3              | Dy1  | Dy1 <sup>1</sup> | 36.16(5)  | C14  | C19  | N3   | 115.2(3) |
| O3 <sup>1</sup> | Dy1  | Dy1 <sup>1</sup> | 36.18(5)  | C18  | C19  | C14  | 119.7(3) |
| O3 <sup>1</sup> | Dy1  | C12              | 162.01(6) | C18  | C19  | N3   | 125.1(3) |
| O3              | Dy1  | C12              | 102.73(6) | C12  | N2   | Dy1  | 118.8(2) |
| O3 <sup>1</sup> | Dy1  | O3               | 72.34(8)  | C1   | N2   | Dy1  | 123.3(2) |
| O3 <sup>1</sup> | Dy1  | N3               | 107.85(8) | C1   | N2   | C12  | 117.9(3) |
| O3              | Dy1  | N3               | 67.55(8)  | C2   | C3   | C4   | 119.8(4) |
| O3              | Dy1  | N2               | 80.24(8)  | C3   | C2   | C1   | 118.9(4) |
| O3 <sup>1</sup> | Dy1  | N2               | 79.45(8)  | C10  | N1   | Dy1  | 122.7(2) |
| O3              | Dy1  | N1               | 140.99(8) | C10  | N1   | C11  | 118.2(3) |
| O3 <sup>1</sup> | Dy1  | N1               | 83.13(8)  | C11  | N1   | Dy1  | 118.8(2) |
| O2              | Dy1  | Dy1 <sup>1</sup> | 113.45(6) | C16  | C17  | C18  | 119.5(4) |
| O2              | Dy1  | C12              | 105.12(7) | N3   | C20  | C22  | 126.3(3) |
| O2              | Dy1  | O3 <sup>1</sup>  | 90.78(8)  | O2   | C21  | C26  | 118.5(3) |
| O2              | Dy1  | O3               | 128.95(8) | O2   | C21  | C22  | 123.6(3) |
| O2              | Dy1  | N3               | 73.14(9)  | C22  | C21  | C26  | 117.9(3) |
| O2              | Dy1  | N2               | 144.87(9) | O1   | C26  | C21  | 113.3(3) |
| O2              | Dy1  | N1               | 79.93(9)  | O1   | C26  | C25  | 126.0(3) |
| N3              | Dy1  | Dy1 <sup>1</sup> | 87.32(6)  | C25  | C26  | C21  | 120.7(4) |

|    |     |                  |           |     |     |     |          |
|----|-----|------------------|-----------|-----|-----|-----|----------|
| N3 | Dy1 | Cl2              | 85.21(7)  | C4  | C12 | C11 | 119.6(3) |
| N3 | Dy1 | N2               | 141.99(9) | N2  | C12 | C4  | 122.1(3) |
| N3 | Dy1 | N1               | 150.83(9) | N2  | C12 | C11 | 118.2(3) |
| N2 | Dy1 | Dy1 <sup>1</sup> | 77.39(6)  | C17 | C16 | C15 | 121.2(3) |
| N2 | Dy1 | Cl2              | 82.67(6)  | N1  | C11 | C12 | 118.3(3) |
| N1 | Dy1 | Dy1 <sup>1</sup> | 114.04(6) | N1  | C11 | C7  | 122.5(3) |
| N1 | Dy1 | Cl2              | 91.29(7)  | C7  | C11 | C12 | 119.2(3) |

<sup>1</sup>-X,-Y,1-Z

**Table S4:** Table for SHAPE calculations complex 1–2

|          |    |                 |                                            |
|----------|----|-----------------|--------------------------------------------|
| OP-8     | 1  | D <sub>8h</sub> | Octagon                                    |
| HPY-8    | 2  | C <sub>7v</sub> | Heptagonal pyramid                         |
| HBPY-8   | 3  | D <sub>6h</sub> | Hexagonal bipyramid                        |
| CU-8     | 4  | O <sub>h</sub>  | Cube                                       |
| SAPR-8   | 5  | D <sub>4d</sub> | Square antiprism                           |
| TDD-8    | 6  | D <sub>2d</sub> | Triangular dodecahedron                    |
| JGBF-8   | 7  | D <sub>2d</sub> | Johnson gyrobifastigium J26                |
| JETBPY-8 | 8  | D <sub>3h</sub> | Johnson elongated triangular bipyramid J14 |
| JBTPR-8  | 9  | C <sub>2v</sub> | Biaugmentedtrigonal prism J50              |
| BTPR-8   | 10 | C <sub>2v</sub> | Biaugmentedtrigonal prism                  |
| JSD-8    | 11 | D <sub>2d</sub> | Snub diphenooid J84                        |
| TT-8     | 12 | T <sub>d</sub>  | Triakis tetrahedron                        |
| ETBPY-8  | 13 | D <sub>3h</sub> | Elongated trigonalbipyramid                |

| [ML <sub>8</sub> ] | OP<br>Y-8 | HPY<br>-8 | HBP<br>Y-8 | CU<br>-8 | SAP<br>R-8  | TDD<br>-8 | JGB<br>F-8 | JETBP<br>Y-8 | JBTP<br>R-8 | BTP<br>R-8 | JS<br>D-8 | TT-<br>8 | ETB<br>PY-8 |
|--------------------|-----------|-----------|------------|----------|-------------|-----------|------------|--------------|-------------|------------|-----------|----------|-------------|
| Dy1                | 32.       | 19.8      | 13.8       | 8.7      | <b>1.21</b> | 2.53      | 14.7       | 27.549       | 3.694       | 2.55       | 6.0       | 9.5      | 23.8        |
| (complex<br>1)     | 432       | 98        | 04         | 52       | <b>9</b>    | 2         | 45         |              |             | 4          | 10        | 13       | 54          |

Dy1 33. 20.8 16.4 10. **1.74** 2.57 15.4 27.014 3.661 3.01 5.8 11. 22.1  
 (complex 469 09 81 972 **0** 5 75 7 44 686 86  
 2)

**Table S5:** Table for SHAPE calculations for complex **3**

|         |   |     |                                         |
|---------|---|-----|-----------------------------------------|
| HP-7    | 1 | D7h | Heptagon                                |
| HPY-7   | 2 | C6v | Hexagonal pyramid                       |
| PBPY-7  | 3 | D5h | Pentagonal bipyramid                    |
| COC-7   | 4 | C3v | Capped octahedron                       |
| CTPR-7  | 5 | C2v | Capped trigonal prism                   |
| JPBPY-7 | 6 | D5h | Johnson pentagonal bipyramid J13        |
| JETPY-7 | 7 | C3v | Johnson elongated triangular pyramid J7 |

| [ML <sub>7</sub> ]            | HP<br>-7   | HPY<br>-7  | PBP<br>Y-7              | CO<br>C-7 | CTP<br>R-7 | JPBP<br>Y-7 | JETPY-7 |
|-------------------------------|------------|------------|-------------------------|-----------|------------|-------------|---------|
| Dy1<br>(complex<br><b>3</b> ) | 31.<br>475 | 21.6<br>08 | <b>2.76</b><br><b>2</b> | 3.4<br>08 | 3.34<br>5  | 6.767       | 17.461  |

### BS-DFT Calculations

To gain insight into the magnetic exchange coupling between the Dy centers in both the compounds we performed density functional theory (DFT) calculations in combination with broken symmetry (BS) approach to obtain information on exchange couplings within the ORCA 4.0 software package.<sup>1</sup> Also the relativistic effects were included with the zero order regular approximation (ZORA), together with the scalar relativistic contracted version of the basis functions def2-TZVP for Gd, and def2-TZVP(-f) for Cl, P, N, O, C and H atoms. In these calculations the well-known B3LYP functional was employed to extract the isotropic exchange coupling using the method of Yamaguchi where the exchange coupling is determined from the energies (E) and expectation values ( $\langle S^2 \rangle$ ) of the triplet and broken symmetry singlet states. Later the obtained isotropic exchange coupling constant  $J$  has been rescaled to the pseudo spin  $\frac{1}{2}$  of the corresponding lanthanide atoms.

$$J = \frac{-(E_T - E_{BSS})}{\langle S^2 \rangle_T - \langle S^2 \rangle_{BSS}} \dots \text{Eq. x}$$

**Table S6:** Energy of the high spin and broken symmetry state

| Energy of the high spin and broken symmetry state for 1 |                  |                       |
|---------------------------------------------------------|------------------|-----------------------|
| Spin State                                              | Energy (Hartree) | $\langle S^2 \rangle$ |
| HS                                                      | -26213.457291    | 57.0109               |
| BS                                                      | -26213.457026    | 8.0096                |
| Energy of the high spin and broken symmetry state for 2 |                  |                       |
| HS                                                      | -26392.439506    | 56.0127               |
| BS                                                      | -26392.439539    | 7.0127                |
| Energy of the high spin and broken symmetry state for 3 |                  |                       |
| HS                                                      | -26755.988898    | 56.0133               |
| BS                                                      | -26755.988933    | 7.0133                |

**Table S7.** Fitting and BS-DFT calculated parameters for complexes 1-3.

| Used parameters for fitting               | Complex 1   | Complex 2   | Complex 3   |
|-------------------------------------------|-------------|-------------|-------------|
| $J$ (cm <sup>-1</sup> )                   | -0.073      | -0.103      | -0.078      |
| $g$                                       | 1.3         | 1.3         | 1.3         |
| $zJ'$ (cm <sup>-1</sup> )                 | -0.008      | +0.0016     | -0.0131     |
| $B_0^2$                                   | -0.1748E+01 | -0.2155E+01 | -0.1758E+01 |
| $B_0^4$                                   | -0.4417E-02 | -0.4897E-02 | -0.5583E-02 |
| $B_0^6$                                   | 0.6357E-05  | 0.1297E-04  | 0.1880E-04  |
| $B_6^6$                                   | 0.2125E-03  | -0.1336E-03 | 0.1357E-03  |
| BS-DFT calculated $J$ (cm <sup>-1</sup> ) | +2.33       | -0.294      | -0.313      |

**Table S8:** Relaxation barriers for selected Dy<sub>2</sub>-SMMs under a zero *dc* field

|    | Complex                                                                                                                                | Geometry                          | Donor ; CN                                                                           | magnetic interaction | U <sub>eff</sub> (K)              | Reference |
|----|----------------------------------------------------------------------------------------------------------------------------------------|-----------------------------------|--------------------------------------------------------------------------------------|----------------------|-----------------------------------|-----------|
| 1  | [Dy <sub>2</sub> (nb) <sub>4</sub> (H <sub>2</sub> L) <sub>2</sub> ]                                                                   | biaugmented trigonal prism        | NO <sub>7</sub> ; 8                                                                  | AF                   | 277.7                             | 7a        |
| 3  | [Dy <sub>2</sub> (HL <sub>1</sub> ) <sub>2</sub> Cl <sub>2</sub> (H <sub>2</sub> O) <sub>3</sub> ]·2H <sub>2</sub> O·MeCN              | hula-hoop; pentagonal bipyramidal | N <sub>2</sub> O <sub>6</sub> ; 8; N <sub>2</sub> O <sub>3</sub> Cl <sub>2</sub> ; 7 | F                    | 204; 103                          | 9e        |
| 4  | [Dy <sub>2</sub> (valdien) <sub>2</sub> (NO <sub>3</sub> ) <sub>2</sub> ]                                                              | dodecahedral                      | N <sub>3</sub> O <sub>5</sub> ; 8                                                    | AF                   | 76                                | 9g        |
| 5  | [Dy <sub>2</sub> (Mq) <sub>4</sub> Cl <sub>6</sub> ](EtOH) <sub>2</sub>                                                                | octahedral                        | O <sub>3</sub> Cl <sub>3</sub> ; 6                                                   | AF                   | 102.4                             | 18a       |
| 6  | [Dy <sub>2</sub> (Py <sub>3</sub> CO) <sub>2</sub> (PhCOO) <sub>4</sub> (MeOH) <sub>2</sub> ]·MeOH                                     | hula-hoop                         | N <sub>3</sub> O <sub>5</sub> ; 8                                                    | F                    | 51 K                              | 18b       |
| 7  | [Dy <sub>2</sub> (MeOH) <sub>2</sub> (HL <sup>1</sup> ) <sub>2</sub> (NO <sub>3</sub> ) <sub>2</sub> ]·2MeOH                           | —                                 | NO <sub>7</sub>                                                                      | F                    | 34 K                              | 18c       |
| 8  | [Dy <sub>2</sub> (ovph) <sub>2</sub> Cl <sub>2</sub> (MeOH) <sub>3</sub> ]·MeCN                                                        | hula-hoop; pentagonal bipyramidal | N <sub>2</sub> O <sub>6</sub> ; 8; N <sub>2</sub> O <sub>3</sub> Cl <sub>2</sub> ; 7 | F                    | 150; 198                          | 18d       |
| 9  | [Dy <sub>2</sub> (CH <sub>3</sub> OH) <sub>2</sub> (HL <sub>2</sub> ) <sub>2</sub> (PhCOO) <sub>2</sub> ]                              | dodecahedral                      | NO <sub>7</sub> ; 8                                                                  | F                    | 94                                | 18e       |
| 10 | [Dy <sub>2</sub> (H <sub>2</sub> O) <sub>2</sub> (ovph) <sub>2</sub> (NO <sub>3</sub> ) <sub>2</sub> ]                                 | dodecahedral                      | N <sub>2</sub> O <sub>6</sub> ; 8                                                    | F                    | 69                                | 18f       |
| 11 | [Dy <sub>2</sub> (TTA) <sub>2</sub> (L) <sub>2</sub> (CH <sub>3</sub> OH) <sub>2</sub> ]·2CH <sub>2</sub> Cl <sub>2</sub>              | biaugmented trigonal prism        | N <sub>2</sub> O <sub>6</sub> ; 8                                                    | F                    | 102                               | 18g       |
| 12 | [Dy <sub>2</sub> (tfa) <sub>2</sub> (L) <sub>2</sub> (CH <sub>3</sub> OH) <sub>2</sub> ]                                               | biaugmented trigonal prism        | N <sub>2</sub> O <sub>6</sub> ; 8                                                    | F                    | 140                               | 18g       |
| 13 | [Dy <sub>2</sub> (a'povh) <sub>2</sub> (OAc) <sub>2</sub> (DMF) <sub>2</sub> ]                                                         | dodecahedral                      | N <sub>2</sub> O <sub>6</sub> ; 8                                                    | AF                   | 322.1                             | 24        |
| 14 | {Dy <sub>2</sub> (L <sub>1</sub> ) <sub>2</sub> (L <sub>2</sub> ) <sub>2</sub> (diphenyl phosphate) <sub>2</sub> (MeOH) <sub>2</sub> } | square antiprism                  | N <sub>3</sub> O <sub>5</sub>                                                        | AF                   | 229.41 (159.45 cm <sup>-1</sup> ) | This work |
| 15 | {Dy <sub>2</sub> (L <sub>1</sub> ) <sub>2</sub> (L <sub>2</sub> ) <sub>2</sub> (NO <sub>3</sub> ) <sub>2</sub> }                       | square antiprism                  | N <sub>3</sub> O <sub>5</sub>                                                        | AF                   | 90.09 (62.62 cm <sup>-1</sup> )   | This work |

**Table S9:** Single\_Anios calculated crystal field parameter for complexes 1-3.

| k | Q           | Complex 1   | Complex 2   | Complex 3   |
|---|-------------|-------------|-------------|-------------|
| 2 | -2          | -0.1241E+00 | 0.1186E+00  | 0.1384E+00  |
|   | -1          | -0.2483E+00 | 0.2372E+00  | 0.2768E+00  |
|   | 0           | -0.1748E+01 | -0.2155E+01 | -0.1758E+01 |
|   | 1           | 0.1476E+01  | -0.1731E+01 | -0.1403E+01 |
|   | 2           | -0.1368E+00 | -0.3070E+00 | -0.9980E+00 |
| 4 | -4          | 0.5838E-02  | 0.1764E-01  | 0.6116E-02  |
|   | -3          | 0.1651E-01  | 0.4989E-01  | 0.1729E-01  |
|   | -2          | 0.4413E-02  | 0.1333E-01  | 0.4623E-02  |
|   | -1          | 0.6241E-02  | 0.1885E-01  | 0.6538E-02  |
|   | 0           | -0.4417E-02 | -0.4897E-02 | -0.5583E-02 |
|   | 1           | 0.1650E-02  | -0.1755E-02 | 0.1188E-01  |
|   | 2           | -0.5190E-02 | 0.3806E-02  | 0.1691E-01  |
|   | 3           | -0.1016E+00 | 0.1049E-01  | 0.5209E-01  |
| 4 | -0.1329E-01 | 0.2420E-01  | -0.3988E-01 |             |
| 6 | -6          | -0.3117E-04 | -0.9273E-04 | -0.8716E-04 |
|   | -5          | -0.1079E-03 | -0.3212E-03 | -0.3019E-03 |
|   | -4          | -0.2302E-04 | -0.6848E-04 | -0.6437E-04 |
|   | -3          | -0.4203E-04 | -0.1250E-03 | -0.1175E-03 |
|   | -2          | -0.2101E-04 | -0.6252E-04 | -0.5876E-04 |
|   | -1          | -0.2658E-04 | -0.7908E-04 | -0.7433E-04 |
|   | 0           | 0.6357E-05  | 0.1297E-04  | 0.1880E-04  |
|   | 1           | -0.1002E-03 | 0.2300E-03  | -0.5919E-04 |
|   | 2           | 0.1204E-03  | -0.1176E-04 | 0.4003E-04  |
|   | 3           | -0.6663E-04 | 0.3021E-04  | -0.1581E-04 |
|   | 4           | -0.1454E-03 | 0.1717E-03  | -0.5644E-04 |
| 5 | -0.7519E-04 | -0.8581E-03 | 0.9992E-03  |             |
| 6 | 0.2125E-03  | -0.1336E-03 | 0.1357E-03  |             |



**Table S10:** Single\_aniso computed energy of the KDs, g and wavefunctions composition for complex 1.

| Kramers doublets | Energy (cm <sup>-1</sup> ) | g <sub>x</sub> | g <sub>y</sub> | g <sub>z</sub> | angle (°) | Wavefunction composition                                                         |
|------------------|----------------------------|----------------|----------------|----------------|-----------|----------------------------------------------------------------------------------|
| 1                | 0.000                      | 0.0001         | 0.0097         | 19.76          |           | 97.92% ±15/2>+1.52% ±9/2>                                                        |
| 2                | 124.528                    | 0.459          | 0.793          | 15.784         | 8.83      | 81.18% ±13/2>+6% ±7/2>+4.2% ±9/2>+3.33% ±5/2>+2.1% ±3/2>+1.7% ±1/2>              |
| 3                | 186.321                    | 2.915          | 3.442          | 11.277         | 28.59     | 50% ±11/2>+12.5% ±5/2>+10% ±3/2>+9% ±7/2>+8.2% ±1/2>+6.1% ±13/2>+5% ±9/2>        |
| 4                | 246.541                    | 7.440          | 6.624          | 1.718          | 102.85    | 38% ±9/2>+15% ±3/2>+20.2% ±11/2>+10.4% ±1/2>+8.8% ±7/2>+3.2% ±5/2>               |
| 5                | 284.716                    | 1.815          | 5.598          | 10.613         | 81.78     | 36% ±1/2>19% ±5/2>+18.3% ±7/2>+13.6% ±9/2>+8% ±3/2>+4.8% ±11/2>                  |
| 6                | 311.207                    | 0.560          | 1.653          | 15.940         | 85.93     | 33% ±3/2>+25% ±5/2>+18.6% ±7/2>+14.7% ±1/2>+5.8% ±9/2>+2.7% ±11/2>               |
| 7                | 399.893                    | 0.046          | 0.066          | 19.781         | 78.20     | 26.6% ±1/2>+25% ±3/2>+20.9% ±5/2>+16.2% ±7/2>+7.8% ±9/2>+2.9% ±11/2>             |
| 8                | 525.312                    | 0.009          | 0.029          | 19.886         | 59.13     | 24.7% ±9/2>+23.1% ±7/2>+17.1% ±11/2>+16.3% ±5/2>+8% ±3/2>+6.4% ±13/2>+3.7% ±1/2> |

**Table S11:** Single\_aniso computed energy of the KDs, g and wavefunctions composition for complex 2.

| Kramers doublets | Energy (cm <sup>-1</sup> ) | g <sub>x</sub> | g <sub>y</sub> | g <sub>z</sub> | angle (°) | Wavefunction composition                                                        |
|------------------|----------------------------|----------------|----------------|----------------|-----------|---------------------------------------------------------------------------------|
| 1                | 0.000                      | 0.036          | 0.039          | 19.844         |           | 99.02% ±15/2>+0.62% ±7/2>                                                       |
| 2                | 141.726                    | 0.357          | 0.478          | 17.002         | 164.73    | 85.84% ±13/2>+9.35% ±11/2>+2.48% ±5/2>+1.13% ±7/2>                              |
| 3                | 235.773                    | 4.190          | 4.764          | 11.377         | 146.14    | 42.41% ±11/2>+20.5% ±9/2>+11.85% ±5/2>+9.9% ±3/2>+6.3% ±7/2>+6% ±13/2>+3% ±1/2> |
| 4                | 280.349                    | 1.042          | 5.058          | 12.116         | 93.57     | 30% ±3/2>+20.08% ±1/2>+15.22% ±9/2>+14% ±11/2>+12% ±5/2>+5.6% ±7/2>             |
| 5                | 306.723                    | 0.551          | 3.505          | 11.033         | 102.85    | 37.5% ±1/2>26.3% ±7/2>+15% ±9/2>+10% ±11/2>+6.2% ±5/2>+3.6% ±3/2>+1.5% ±13/2>   |
| 6                | 383.889                    | 0.937          | 2.658          | 15.474         | 99.29     | 25.6% ±5/2>+22% ±3/2>+21.6% ±7/2>+14.8% ±9/2>+5.8% ±9/2>+6.5%                   |

|   |         |       |       |        |       |                                                                                                                                                                          |
|---|---------|-------|-------|--------|-------|--------------------------------------------------------------------------------------------------------------------------------------------------------------------------|
|   |         |       |       |        |       | $\pm 1/2\rangle + 7.2\% \pm 11/2\rangle + 2.24\% \pm 13/2\rangle$                                                                                                        |
| 7 | 453.055 | 0.802 | 1.101 | 18.341 | 71.70 | $18\% \pm 3/2\rangle + 22.5\% \pm 5/2\rangle + 15.2\% \pm 7/2\rangle + 15\% \pm 9/2\rangle + 17.4\% \pm 1/2\rangle + 9.8\% \pm 11/2\rangle + 2\% \pm 13/2\rangle$        |
| 8 | 585.882 | 0.067 | 0.194 | 19.560 | 67.33 | $13\% \pm 1/2\rangle + 16.34\% \pm 3/2\rangle + 19.2\% \pm 5/2\rangle + 23.54\% \pm 7/2\rangle + 19.25\% \pm 9/2\rangle + 7.3\% \pm 11/2\rangle + 1.2\% \pm 13/2\rangle$ |

**Table S13:** Single\_aniso computed energy of the KDs, g and wavefuctions composition for complex 3.

| Kramers doublets | Energy (cm <sup>-1</sup> ) | g <sub>x</sub> | g <sub>y</sub> | g <sub>z</sub> | angle (°) | Wavefunction composition                                                                                                                                 |
|------------------|----------------------------|----------------|----------------|----------------|-----------|----------------------------------------------------------------------------------------------------------------------------------------------------------|
| 1                | 0.000                      | 0.075          | 0.096          | 19.775         |           | $97.31\% \pm 15/2\rangle + 1.70\% \pm 11/2\rangle$                                                                                                       |
| 2                | 129.341                    | 1.263          | 5.728          | 12.539         | 26.63     | $62\% \pm 13/2\rangle + 5\% \pm 7/2\rangle + 7\% \pm 5/2\rangle + 23.74\% \pm 3/2\rangle + 11\% \pm 1/2\rangle$                                          |
| 3                | 163.639                    | 2.914          | 3.642          | 11.006         | 71.18     | $30\% \pm 13/2\rangle + 6\% \pm 11/2\rangle + 7\% \pm 9/2\rangle + 3\% \pm 7/2\rangle + 11\% \pm 5/2\rangle + 13\% \pm 3/2\rangle + 30\% \pm 1/2\rangle$ |
| 4                | 257.829                    | 4.543          | 6.541          | 8.973          | 14.98     | $60\% \pm 11/2\rangle + 16\% \pm 3/2\rangle + 10\% \pm 1/2\rangle + 5\% \pm 9/2\rangle + 2.2\% \pm 5/2\rangle + 4\% \pm 7/2\rangle$                      |
| 5                | 311.823                    | 1.022          | 2.240          | 10.181         | 77.42     | $8\% \pm 11/2\rangle + 19\% \pm 9/2\rangle + 21\% \pm 7/2\rangle + 32\% \pm 5/2\rangle + 9\% \pm 3/2\rangle + 12\% \pm 1/2\rangle$                       |
| 6                | 326.109                    | 1.024          | 3.938          | 12.237         | 56.83     | $37\% \pm 9/2\rangle + 25\% \pm 7/2\rangle + 12\% \pm 11/2\rangle + 7\% \pm 5/2\rangle + 4\% \pm 1/2\rangle$                                             |
| 7                | 461.476                    | 0.991          | 2.989          | 15.491         | 74.51     | $21\% \pm 5/2\rangle + 17\% \pm 9/2\rangle + 13\% \pm 7/2\rangle + 19\% \pm 3/2\rangle + 22\% \pm 1/2\rangle + 9\% \pm 11/2\rangle$                      |
| 8                | 488.610                    | 0.622          | 3.786          | 16.384         | 108.78    | $31\% \pm 7/2\rangle + 17\% \pm 9/2\rangle + 22\% \pm 5/2\rangle + 17\% \pm 3/2\rangle + 12\% \pm 1/2\rangle + 4\% \pm 11/2\rangle$                      |

### Computational Methods:

The *ab initio* calculations were performed with MOLCAS 8.2 software package. For all the atoms ANO-RCC basis set of function were used as [ANO-RCC...6s5p3d1f.] for Dy, [ANO-RCC...6s5p3d1f.] for Lu, [ANO-RCC...4s3p1d.] for P, [ANO-RCC...3s2p1d.] for O and N, [ANO-RCC...3s2p.] for C and [ANO-RCC...2s.] for H, including the relativistic effects within Douglas Kroll Hess Hamiltonian.<sup>2</sup> To save the disk space the Cholesky decomposition for two electrons integral was employed throughout the calculations. We have included nine electrons in seven metal based ‘f’ orbitals, CAS (9, 7) in the active space of CASSCF calculations and 21 sextets in the RASSCF method. The RASSI-SO program<sup>3</sup> has been used to include the spin orbit coupling in the 21 sextets optimized in the previous calculations. The SINGLE\_ANISO module<sup>4</sup> was used to calculate the energy, the transition matrix element between the KDs and relevant information.

References:

1. F. Neese, The ORCA program system, *WIREs Comput. Mol. Sci.*, 2012, **2**, 73-78.
2. (a) Douglas, M.; Kroll, N. M. Quantum electrodynamical corrections to the fine structure of helium. *Ann. Phys.* **1974**, *82*, 89-155. (b) Hess, B. A., Relativistic electronic-structure calculations employing a two-component no-pair formalism with external-field projection operators. *Phys. Rev. A* **1986**, *33*, 3742-3748. (c) Reiher, M. Relativistic Douglas–Kroll–Hess theory. *WIREs Comput. Mol. Sci.* 2012, *2*, 139-149.
3. Malmqvist, P. Å.; Roos, B. O.; Schimmelpennig, B. The restricted active space (RAS) state interaction approach with spin–orbit coupling. *Chem. Phys. Lett.* **2002**, *357*, 230-240.
4. Chibotaru, L. F.; Ungur, L. Ab initio calculation of anisotropic magnetic properties of complexes. I. Unique definition of pseudospin Hamiltonians and their derivation. *J. Chem. Phys.* **2012**, *137*, 064112.
